# Supplementary material for: Nucleolin Overexpression Predicts Patient Prognosis While Providing a Framework for Targeted Therapeutic Intervention in Lung Cancer
Source: MDPI journal article supplement (doi:10.3390/cancers14092217), 2022-04-28
Supplement: s1 [file s1]

Supplementary Materials

# Nucleolin Overexpression Predicts Patient Prognosis While Providing a Framework for Targeted Therapeutic Intervention in Lung Cancer

Ângela Valério-Fernandes <sup>1,2</sup>, Nuno A. Fonseca <sup>1,3</sup>, Nélío Gonçalves <sup>1</sup>, Ana F. Cruz <sup>1,4</sup>, Marta I. Pereira <sup>1,5</sup>, Ana C. Gregório <sup>1,3</sup>, Vera Moura <sup>1,3</sup>, Ana F. Ladeirinha <sup>6</sup>, Ana Alarcão <sup>6</sup>, Joana Gonçalves <sup>7</sup>, Antero Abrunhosa <sup>7</sup>, Joana B. Melo <sup>8,9</sup>, Lina Carvalho <sup>6</sup>, Sérgio Simões <sup>1,4</sup> and João N. Moreira <sup>1,4,\*</sup>

## Supplementary Figures

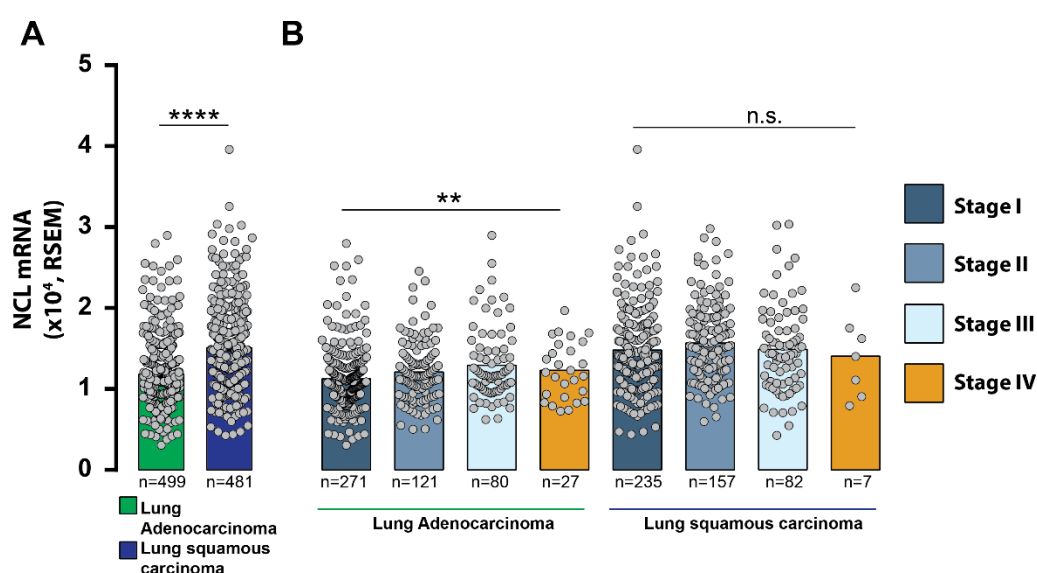

**Figure S1.** Nucleolin mRNA expression at different tumor stages of lung adenocarcinoma and squamous carcinoma. TCGA's lung adenocarcinomas and squamous carcinomas (PanCancer Atlas datasets,  $n = 566$  and  $487$ , respectively) were analyzed. Cases were selected according to completeness of available information. Representation of nucleolin mRNA expression levels (RNA-Seq by Expectation-Maximization-RSEM) (A) by lung adenocarcinomas or squamous carcinomas, (B) further stratified according to the pathological staging. Bars represent mean expression. Dots represent individual values (\*\*\*\*  $p < 0.0001$  calculated by Mann-Whitney test; \*\*  $p < 0.01$ , n.s.  $p > 0.05$  calculated by Kruskal-Wallis test).

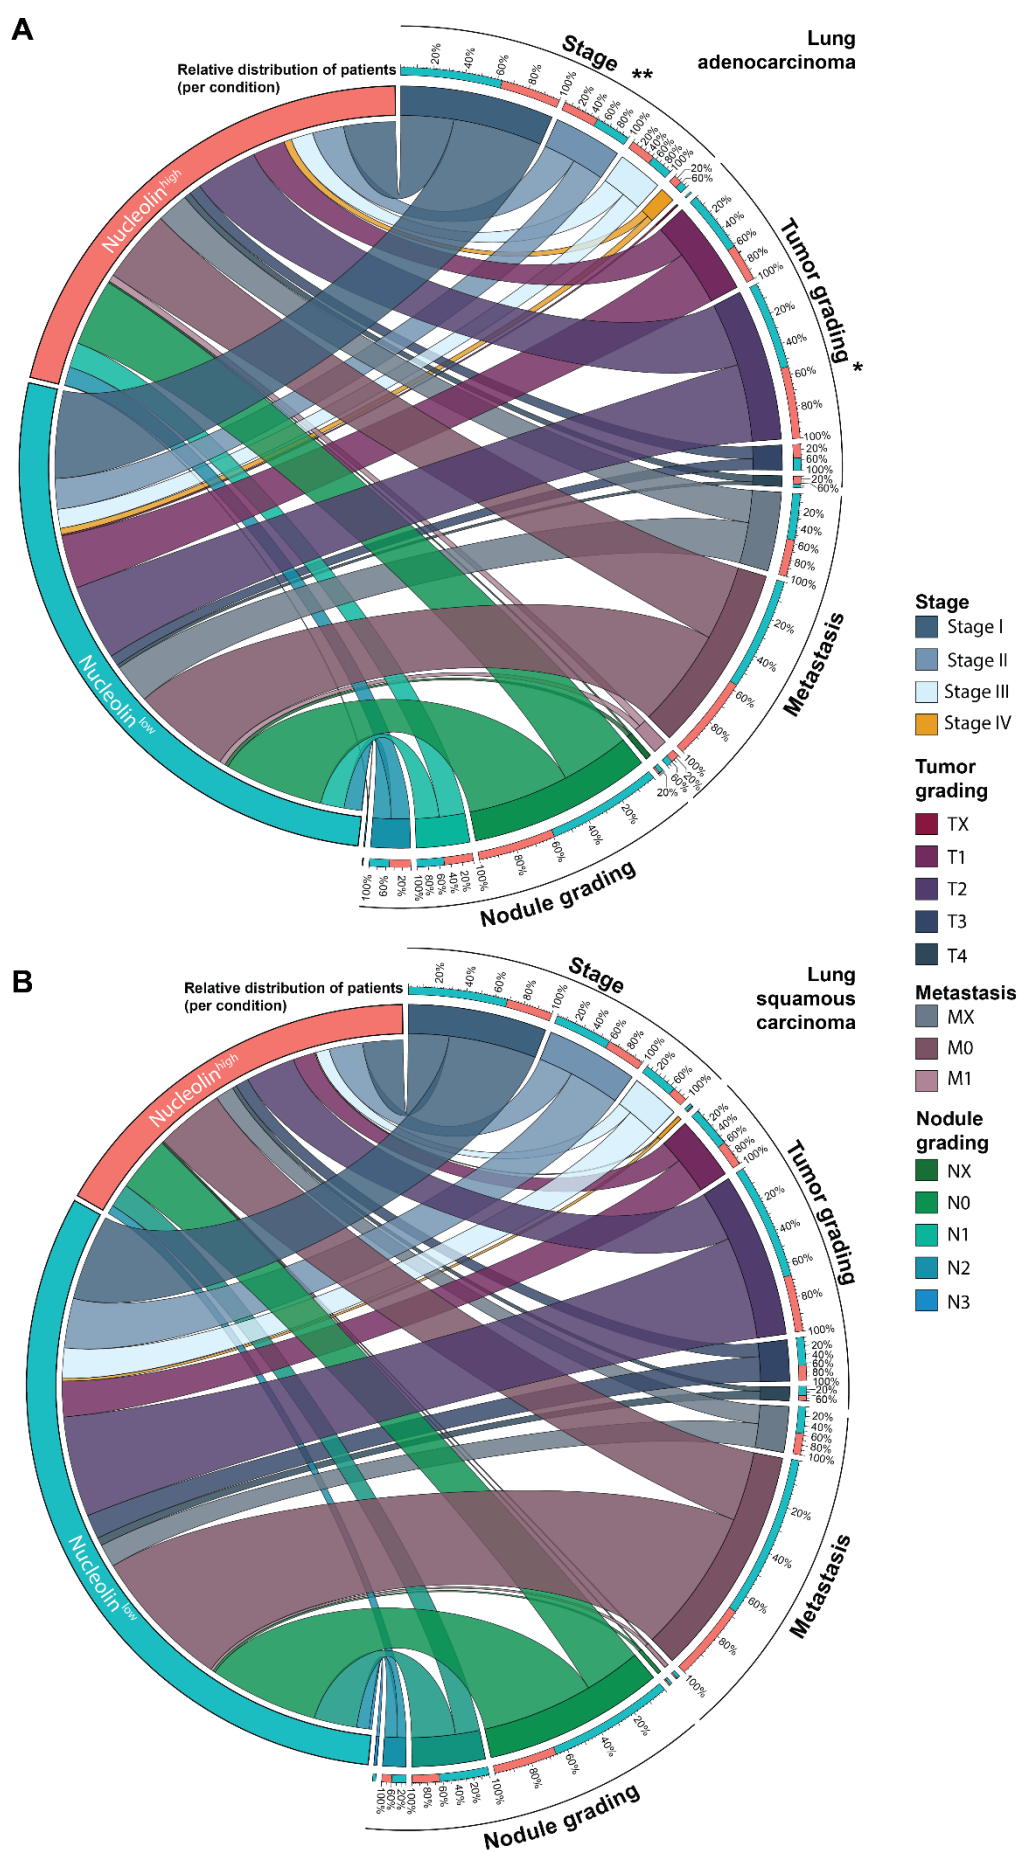

**Figure S2.** TCGA's lung adenocarcinomas and squamous carcinomas (PanCancer Atlas datasets,  $n = 566$  and 487, respectively) were analyzed. **(A)** Lung adenocarcinoma and **(B)** squamous carcinoma grading characterization according to nucleolin expression levels (\*\*  $p < 0.01$ , \*  $p < 0.05$ , calculated by  $\chi^2$  test).

**Figure 4A - Nucleolin total extracts**

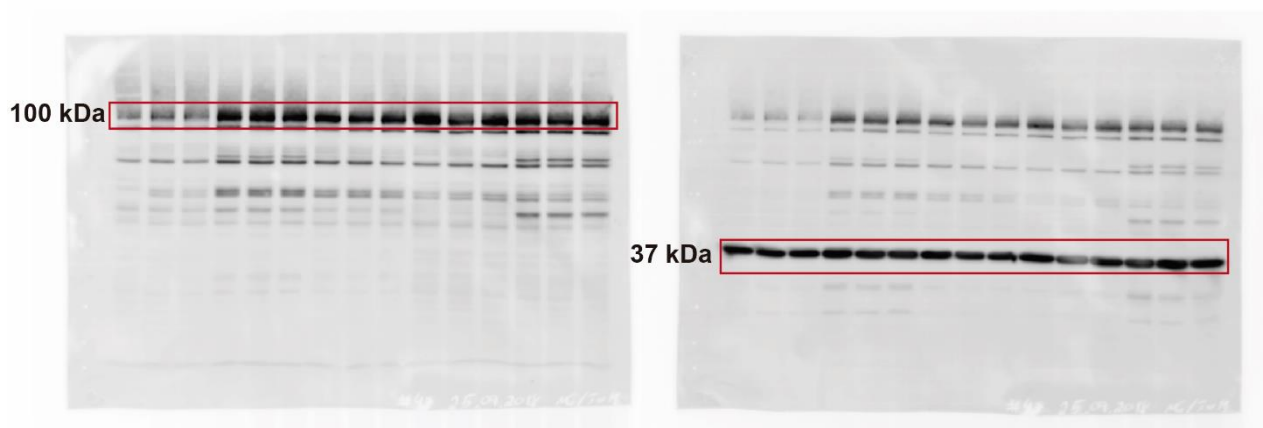

**Figure 4B - Nucleolin cytoplasm/membrane extracts**

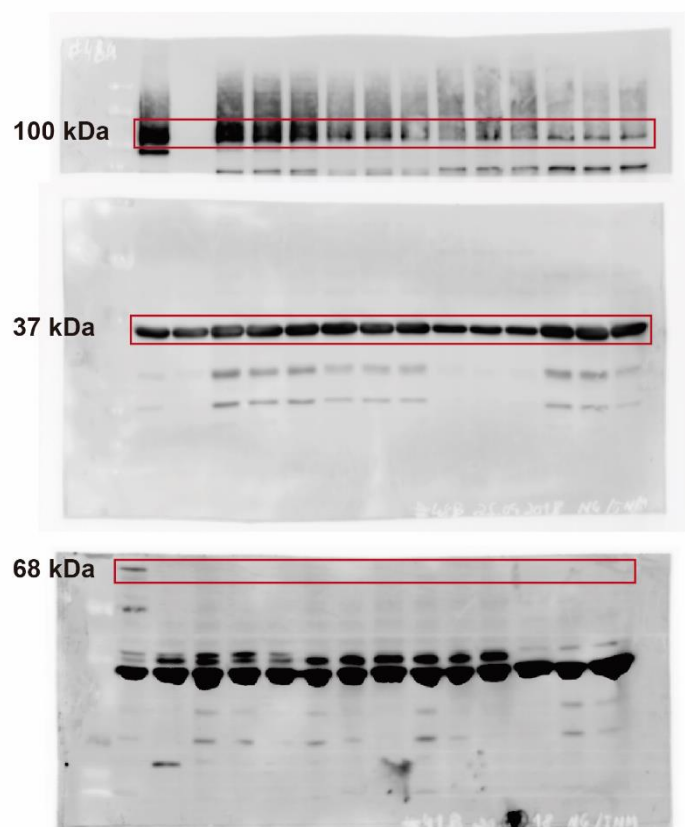

**Figure S3.** Whole western blots. Representative membranes stained with GAPDH (37 kDa); lamin B1 (68 kDa) or nucleolin (100 kDa).

## Supplementary Tables

**Table S1.** Estimated median time-to-event for the lung adenocarcinoma (n=501) and squamous carcinoma (n=479) data sets from the TCGA

| Disease                 | Parameter                 | Stage stratification | Nucleolin <sup>low</sup> |                         |       | Nucleolin <sup>high</sup> |                         |       |
|-------------------------|---------------------------|----------------------|--------------------------|-------------------------|-------|---------------------------|-------------------------|-------|
|                         |                           |                      | Median (months)          | 95% Confidence Interval |       | Median (months)           | 95% Confidence Interval |       |
|                         |                           |                      |                          | Lower                   | Upper |                           | Lower                   | Upper |
| Lung Adenocarcinoma     | Overall Survival          | Whole Cohort         | 54.3                     | 49.1                    | 110.5 | 39.9                      | 31.3                    | 50.2  |
|                         |                           | Stage I              | 110.5                    | 54.3                    | NA    | 56.7                      | 42.3                    | NA    |
|                         |                           | Stage ≥ II           | 34.4                     | 30.3                    | 49.1  | 18.87                     | 8.02                    | NA    |
|                         | Progression-free survival | Whole Cohort         | 45.3                     | 35.6                    | 62.2  | 23.9                      | 15.5                    | 34.4  |
|                         |                           | Stage I              | 58.3                     | 47.6                    | NA    | 29.5                      | 25.4                    | NA    |
|                         |                           | Stage ≥ II           | 28.4                     | 22.4                    | 41.4  | 14.5                      | 12.7                    | 25.4  |
| Lung squamous carcinoma | Overall Survival          | Whole Cohort         | 48.3                     | 36.1                    | 62.9  | 73.1                      | 46.9                    | 118.4 |
|                         |                           | Stage I              | 32.9                     | 19.3                    | NA    | 65.2                      | 56.3                    | 103.5 |
|                         |                           | Stage ≥ II           | 31.7                     | 23.3                    | 39.1  | 79.2                      | 73.1                    | NA    |
|                         | Progression-free survival | Whole Cohort         | NA *                     | NA                      | NA    | 62.9                      | 51.8                    | 101.3 |
|                         |                           | Stage I              | 96.1                     | 96.1                    | NA    | 62.9                      | 54.4                    | NA    |
|                         |                           | Stage ≥ II           | NA **                    | 42                      | NA    | 50.3                      | 26.4                    | NA    |

\* Maximum: 133.7 months. \*\* Maximum: 126.2 months

**Table S2.** Estimated 5-year overall and progression-free survival for the lung adenocarcinoma ( $n = 501$ ) and squamous carcinoma ( $n = 479$ ) data sets from the TCGA.

| Disease                 | Parameter                 | Stage stratification | Nucleolin <sup>low</sup> |                         |           | Nucleolin <sup>high</sup> |                         |           |
|-------------------------|---------------------------|----------------------|--------------------------|-------------------------|-----------|---------------------------|-------------------------|-----------|
|                         |                           |                      | 5-year Survival (%)      | 95% Confidence Interval |           | 5-year Survival (%)       | 95% Confidence Interval |           |
|                         |                           |                      |                          | Lower (%)               | Upper (%) |                           | Lower (%)               | Upper (%) |
| Lung Adenocarcinoma     | Overall Survival          | Whole Cohort         | 47.1                     | 38.2                    | 58        | 33.7                      | 25.4                    | 44.9      |
|                         |                           | Stage I              | 60.9                     | 49.8                    | 74.5      | 45.6                      | 32.5                    | 63.9      |
|                         |                           | Stage $\geq$ II      | 27.5                     | 18.9                    | 40.2      | 8.53                      | 1.43                    | 50.9      |
|                         | Progression-free survival | Whole Cohort         | 40.9                     | 33.4                    | 50        | 31.8                      | 22.7                    | 44.6      |
|                         |                           | Stage I              | 47.6                     | 37.3                    | 60.7      | 42.3                      | 29                      | 61.7      |
|                         |                           | Stage $\geq$ II      | 32.4                     | 22.9                    | 46        | 21                        | 10.1                    | 43.6      |
| Lung squamous carcinoma | Overall Survival          | Whole Cohort         | 44.1                     | 37.2                    | 52.2      | 55.5                      | 46.4                    | 66.3      |
|                         |                           | Stage I              | 41.6                     | 24.3                    | 71.5      | 55.9                      | 47.4                    | 65.9      |
|                         |                           | Stage $\geq$ II      | 29.6                     | 20.6                    | 42.5      | 61.5                      | 50.1                    | 75.6      |
|                         | Progression-free survival | Whole Cohort         | 63.7                     | 52.4                    | 77.5      | 51.2                      | 43.8                    | 59.9      |
|                         |                           | Stage I              | 69.7                     | 57.7                    | 84.3      | 54.6                      | 41.7                    | 71.5      |
|                         |                           | Stage $\geq$ II      | 63.2                     | 49.1                    | 81.3      | 45.1                      | 35.7                    | 56.9      |

**Table S3.** Global score of nucleolin immunoreactivity in different histologically classified human pulmonary carcinomas and adjacent non-malignant lung tissues ( $n = 58$ ).

| Cell type                              | Nucleolin immunoreactivity | Histological type                        |                         |                         |                       | Total     |
|----------------------------------------|----------------------------|------------------------------------------|-------------------------|-------------------------|-----------------------|-----------|
|                                        |                            | Adenocarcinoma                           | Squamous cell carcinoma | Adenosquamous carcinoma | Pleomorphic carcinoma |           |
|                                        |                            | Frequency of nucleolin expression (N, %) |                         |                         |                       |           |
| Cancer cells                           | Low/ Negative              | 0 (0.0)                                  | 0 (0.0)                 | 1 (12.5)                | 0 (0.0)               | 1 (1.7)   |
|                                        | Weak                       | 0 (0.0)                                  | 1 (8.3)                 | 1 (12.5)                | 0 (0.0)               | 2 (3.4)   |
|                                        | Moderate                   | 0 (0.0)                                  | 3 (25.0)                | 0 (0.0)                 | 0 (0.0)               | 3 (5.2)   |
|                                        | High                       | 28 (100.0)                               | 8 (66.6)                | 6 (75.0)                | 10 (100.0)            | 52 (89.7) |
|                                        | Extra-nuclear              | 9 (32.1)                                 | 4 (33.3)                | 2 (25.0)                | 4 (40.0)              | 19 (32.6) |
| Tumour stroma                          | Low/ Negative              | 1 (3.6)                                  | 0 (0.0)                 | 1 (12.5)                | 0 (0.0)               | 2 (3.4)   |
|                                        | Weak                       | 9 (32.1)                                 | 3 (25.0)                | 2 (25.0)                | 2 (20.0)              | 16 (27.6) |
|                                        | Moderate                   | 3 (10.7)                                 | 6 (50.0)                | 2 (25.0)                | 1 (10.0)              | 12 (20.7) |
|                                        | High                       | 15 (53.6)                                | 3 (25.0)                | 3 (37.5)                | 7 (70.0)              | 28 (48.3) |
| Normal Lung Epithelium (Basal cells)   | Low/ Negative              | 2 (8.0)                                  | 1 (12.5)                | 3 (42.9)                | 3 (50.0)              | 9 (19.6)  |
|                                        | Weak                       | 3 (12.0)                                 | 2 (25.0)                | 0 (0.0)                 | 0 (0.0)               | 5 (10.9)  |
|                                        | Moderate                   | 2 (8.0)                                  | 1 (12.5)                | 1 (14.3)                | 0 (0.0)               | 4 (8.7)   |
|                                        | High                       | 18 (72.0)                                | 4 (50.0)                | 3 (42.9)                | 3 (50.0)              | 28 (60.9) |
|                                        | n/a *                      | 3                                        | 4                       | 1                       | 4                     |           |
| Alveoli (Alveolar type II pneumocytes) | Low/ Negative              | 11 (44.0)                                | 5 (55.5)                | 3 (42.9)                | 3 (33.3)              | 22 (44.0) |
|                                        | Weak                       | 1 (4.0)                                  | 1 (11.1)                | 0 (0.0)                 | 2 (22.2)              | 4 (8.0)   |
|                                        | Moderate                   | 4 (16.0)                                 | 2 (22.2)                | 3 (42.9)                | 3 (33.3)              | 12 (24.0) |
|                                        | High                       | 9 (36.0)                                 | 1 (11.1)                | 1 (14.3)                | 1 (11.1)              | 12 (24.0) |
|                                        | n/a*                       | 3                                        | 3                       | 1                       | 1                     |           |

\* n/a: not applicable = either basal cells or type II pneumocytes were not present in the analyzed patient-derived adjacent non-malignant tissue of tumour slices.

**Table S4.** Global score of nucleolin immunoreactivity in tumor stromas of AD ( $n = 28$ ), SQ ( $n = 12$ ), ADSQ ( $n = 8$ ) and PM ( $n = 10$ ) human pulmonary carcinomas

| Tumor Stroma      |                | Frequency of Nucleolin Expression (N, %) |           |           |          |
|-------------------|----------------|------------------------------------------|-----------|-----------|----------|
| Histological type | Cell type (%)# | Negative                                 | Weak      | Moderate  | High     |
| AD                | TEC* (100)     | 0 (0.0)                                  | 12 (42.9) | 15 (53.6) | 1 (3.6)  |
|                   | TIL** (100)    | 2 (7.1)                                  | 7 (25.0)  | 16 (57.1) | 3 (10.7) |
|                   | CAF*** (78.6)  | 7 (25.0)                                 | 9 (32.1)  | 6 (21.4)  | 0 (0.0)  |
| SQ                | TEC (100)      | 2 (16.7)                                 | 4 (33.3)  | 3 (25.0)  | 3 (25.0) |
|                   | TIL (100)      | 4 (33.3)                                 | 5 (41.7)  | 0 (0.0)   | 3 (25.0) |
|                   | CAF (75.0)     | 3 (25.0)                                 | 2 (16.7)  | 2 (16.7)  | 2 (16.7) |
| ADSQ              | TEC (87.5)     | 0 (0.0)                                  | 5 (62.5)  | 2 (25.0)  | 0 (0.0)  |
|                   | TIL (62.5)     | 0 (0.0)                                  | 2 (25.0)  | 1 (12.5)  | 2 (25.0) |
|                   | CAF (62.5)     | 0 (0.0)                                  | 2 (25.0)  | 2 (25.0)  | 1 (12.5) |
| PM                | TEC (100)      | 0 (0.0)                                  | 8 (80.0)  | 2 (20.0)  | 0 (0.0)  |
|                   | TIL (90.0)     | 0 (0.0)                                  | 4 (40.0)  | 3 (30.0)  | 2 (20.0) |
|                   | CAF (80.0)     | 1 (10.0)                                 | 2 (20.0)  | 4 (40.0)  | 1 (10.0) |

\* Tumor Endothelial Cells; \*\* Tumor Infiltrating Lymphocytes; \*\*\* Cancer-Associated Fusiform cells/ Fibroblasts; # Percentage of cell type in the analyzed patient-derived tumor slices, for each sub-type.

**Table S5.** Cytotoxicity of different formulations of liposomal doxorubicin against lung cancer cells.

|       | Compounds | 1 h                   |                       | 4 h                   |                       | 24 h                  |                       |
|-------|-----------|-----------------------|-----------------------|-----------------------|-----------------------|-----------------------|-----------------------|
|       |           | IC <sub>50</sub> (μM) | IC <sub>90</sub> (μM) | IC <sub>50</sub> (μM) | IC <sub>90</sub> (μM) | IC <sub>50</sub> (μM) | IC <sub>90</sub> (μM) |
| H1975 | free-Dox  | < 0.01                | > 2.50                | 0.07 ± 0.01           | 1.11 ± 0.36           | 0.01 ± 0.00           | 0.13 ± 0.07           |
|       | L[Dox]    | 4.95 ± 1.10           | > 100                 | 1.85 ± 0.38           | 77.49 ± 42.36         | < 0.39                | 1.42 ± 0.63           |
|       | NS-L[Dox] | 5.44 ± 1.35           | > 100                 | 1.23 ± 0.10           | 75.48 ± 42.60         | < 0.39                | 1.04 ± 0.75           |
|       | F3-L[Dox] | 0.44 ± 0.25*          | 25.71 ± 12.94         | < 0.39                | 3.45 ± 0.92           | < 0.39                | 0.77 ± 0.49           |
| A549  | free-Dox  | 0.42 ± 0.00           | > 2.50                | 0.27 ± 0.08           | > 2.50                | 0.02 ± 0.00           | 0.51 ± 0.06           |
|       | L[Dox]    | 8.37 ± 0.89           | > 100                 | 4.30 ± 1.15           | > 100                 | < 0.39                | > 100                 |
|       | NS-L[Dox] | 11.10 ± 1.98          | > 100                 | 4.78 ± 1.25           | > 100                 | < 0.39                | > 100                 |
|       | F3-L[Dox] | 1.51 ± 0.79 *         | > 100                 | 0.89 ± 0.66*          | > 100                 | < 0.39                | 32.51 ± 20.09         |
| H441  | free-Dox  | 0.04 ± 0.00           | > 2.50                | 0.08 ± 0.03           | 0.54 ± 0.32           | < 0.01                | 0.07 ± 0.06           |
|       | L[Dox]    | 5.03 ± 1.56           | 20.24 ± 3.62          | 1.34 ± 0.50           | 9.71 ± 3.56           | < 0.39                | 0.77 ± 0.61           |
|       | NS-L[Dox] | 4.15 ± 0.99           | 34.59 ± 11.36         | 0.79 ± 0.27           | 10.10 ± 5.79          | < 0.39                | < 0.39                |
|       | F3-L[Dox] | 1.98 ± 0.79           | 7.09 ± 2.00#          | 0.56 ± 0.21           | 2.32 ± 0.82           | < 0.39                | < 0.39                |

Data represent the cytotoxic activities (IC<sub>50</sub> and IC<sub>90</sub>) from dose-response curves of either free or liposomal doxorubicin ( $n = 3$ ). \* F3-L[Dox] was compared with NS-L[Dox] and L[Dox] using one-way ANOVA and Tukey's post-test and differences were considered statistically significant with  $P < 0.05$ . # F3-L[Dox] was compared with L[Dox] using parametric unpaired t-test and difference was considered statistically significant with  $P < 0.05$ .
